# Supplementary material for: A histomorphological atlas of resected mesothelioma discovered by self-supervised learning from 3446 whole-slide images
Source: Research Square preprint supplement (doi:10.21203/rs.3.rs-5678715/v1), 2025-01-16
Supplement: Supplementary file 1 [file 2a1ac06a0e68be92bf074ce0.pdf]

| Option 1 - Epithelioid tumour |                                                                                                                            |                       |               |             |              |       |                |
|-------------------------------|----------------------------------------------------------------------------------------------------------------------------|-----------------------|---------------|-------------|--------------|-------|----------------|
|                               | Topic                                                                                                                      | Options               |               |             |              |       |                |
| 1                             | Predominant architectural growth pattern                                                                                   | Tubular               | Papillary     | Trabecular  | Adenomaotoid | Solid | Micropapillary |
| 2                             | Second most predominant pattern                                                                                            | Tubular               | Papillary     | Trabecular  | Adenomaotoid | Solid | Micropapillary |
| 3                             | Nuclear atypia                                                                                                             | Mild                  | Moderate      | Severe      |              |       |                |
| 4                             | Inflammation*                                                                                                              | None-sparse           | Mild-moderate | Marked      |              |       |                |
| 5                             | Necrosis**                                                                                                                 | None                  | Some          | Universal   |              |       |                |
| 6                             | Stroma:Tumour ratio                                                                                                        | More stroma           | Roughly equal | More tumour |              |       |                |
| 7                             | Stromal cellularity***                                                                                                     | Low                   | Moderate      | High        |              |       |                |
| 8                             | ^Biphasic features?                                                                                                        | No                    | Yes           |             |              |       |                |
| 9                             | Other notable features or comments                                                                                         | free text/annotations |               |             |              |       |                |
|                               | ^By biphasic, we refer to mixed epithelioid and spindled morphology within individual tiles rather than within the cluster |                       |               |             |              |       |                |

| Option 2 - Spindle cells / extracellular matrix |                                                                                                                            |                       |                               |
|-------------------------------------------------|----------------------------------------------------------------------------------------------------------------------------|-----------------------|-------------------------------|
|                                                 | Topic                                                                                                                      | Options               |                               |
| 1                                               | Cellularity                                                                                                                | Low                   | Medium                        |
| 2                                               | Architecture                                                                                                               | Orderly (parallel)    | Disorderly (random/storiform) |
| 3                                               | Presence of desmoplastic sarcomatoid morphology                                                                            | Present               | Absent                        |
| 4                                               | Nuclear atypia                                                                                                             | None/mild             | Severe                        |
| 5                                               | Inflammation*                                                                                                              | None-sparse           | Marked                        |
| 6                                               | Necrosis**                                                                                                                 | None                  | Universal                     |
| 7                                               | ^Biphasic features?                                                                                                        | No                    | Yes                           |
| 8                                               | Other notable features or comments                                                                                         | free text/annotations |                               |
|                                                 | ^By biphasic, we refer to mixed epithelioid and spindled morphology within individual tiles rather than within the cluster |                       |                               |

| Option 3 - Non-tumour |                                      |                         |                                  |           |              |             |                         |
|-----------------------|--------------------------------------|-------------------------|----------------------------------|-----------|--------------|-------------|-------------------------|
|                       | Topic                                | Options                 |                                  |           |              |             |                         |
|                       | Tiles contain mostly (by area)       | Normal/near-normal lung |                                  |           | Collagenosis | Haemorrhage | Vessels (wall or lumen) |
|                       | Second most common feature (by area) | Normal/near-normal lung | Non-neoplastic pathological lung | Elastosis | Collagenosis | Haemorrhage | Vessels (wall or lumen) |
|                       | Inflammation*                        | None-sparse             | Mild-moderate                    | Marked    |              |             |                         |
|                       | Necrosis**                           | None                    | Some                             | Universal |              |             |                         |
|                       | Other notable features or comments   | free text/annotations   |                                  |           |              |             |                         |
|                       | Inflammation*                        | None-sparse             | Mild-moderate                    | Marked    |              |             |                         |

**Supplementary Table 1: Pathologist Annotation Sheet Criteria**

| Leiden Resolution | Dataset   | AUC                | Precision Score    | Sensitivity        | Specificity        |
|-------------------|-----------|--------------------|--------------------|--------------------|--------------------|
| 2.0               | LATTICe-M | 86.9 ± 0.04        | 62.3 ± 0.15        | <b>80.6 ± 0.12</b> | 72.9 ± 0.11        |
| 4.0               |           | <b>87.2 ± 0.03</b> | 63.1 ± 0.15        | 80.2 ± 0.11        | 74.5 ± 0.08        |
| 7.0               |           | 86.5 ± 0.03        | <b>65.0 ± 0.15</b> | 77.8 ± 0.09        | <b>76.9 ± 0.09</b> |
| 2.0               | TCGA      | 76.5 ± 0.04        | 62.1 ± 0.08        | 61.9 ± 0.1         | 75.3 ± 0.1         |
| 4.0               |           | <b>80.5 ± 0.03</b> | 68.3 ± 0.1         | <b>69.8 ± 0.08</b> | <b>79.4 ± 0.09</b> |
| 7.0               |           | 78.2 ± 0.06        | <b>65.3 ± 0.16</b> | 63.8 ± 0.11        | 78.7 ± 0.1         |

**Supplementary Table 2:** Area under the curve (AUC), Precision, Sensitivity, Specificity scores for the mesothelioma subtype classification task on LATTICe-M (primary) and TCGA (additional) cohorts across different Leiden clustering algorithm resolutions. The scores are averaged over 5-fold cross-validation and after undersampling using the edited nearest neighbour model (ENN).

| Leiden Resolutions | HPCs       |                    |                    | Clinical and HPCs |                    |
|--------------------|------------|--------------------|--------------------|-------------------|--------------------|
|                    | Train      | Test               | TCGA               | Train             | Test               |
| 2.0                | 0.67 ± 0.0 | 0.65 ± 0.03        | 0.65 ± 0.01        | 0.68 ± 0.01       | 0.66 ± 0.03        |
| 4.0                | 0.69 ± 0.0 | <b>0.66 ± 0.03</b> | 0.66 ± 0.02        | 0.7 ± 0.0         | 0.66 ± 0.03        |
| 7.0                | 0.7 ± 0.01 | 0.65 ± 0.04        | <b>0.66 ± 0.01</b> | 0.71 ± 0.01       | 0.66 ± 0.04        |
| 9.0                | 0.7 ± 0.01 | 0.66 ± 0.04        | 0.65 ± 0.02        | 0.71 ± 0.01       | <b>0.67 ± 0.04</b> |

**Supplementary Table 3:** Patient outcome prediction using Cox proportional hazard ratio model C-indices in train, test (LATTICe-M), and additional (TCGA) datasets across different Leiden resolutions with 5-fold cross-validated scores. Clinical information, including subtype, TNM stage, and age, was added to the patient vectors derived from HPL for the primary dataset only.

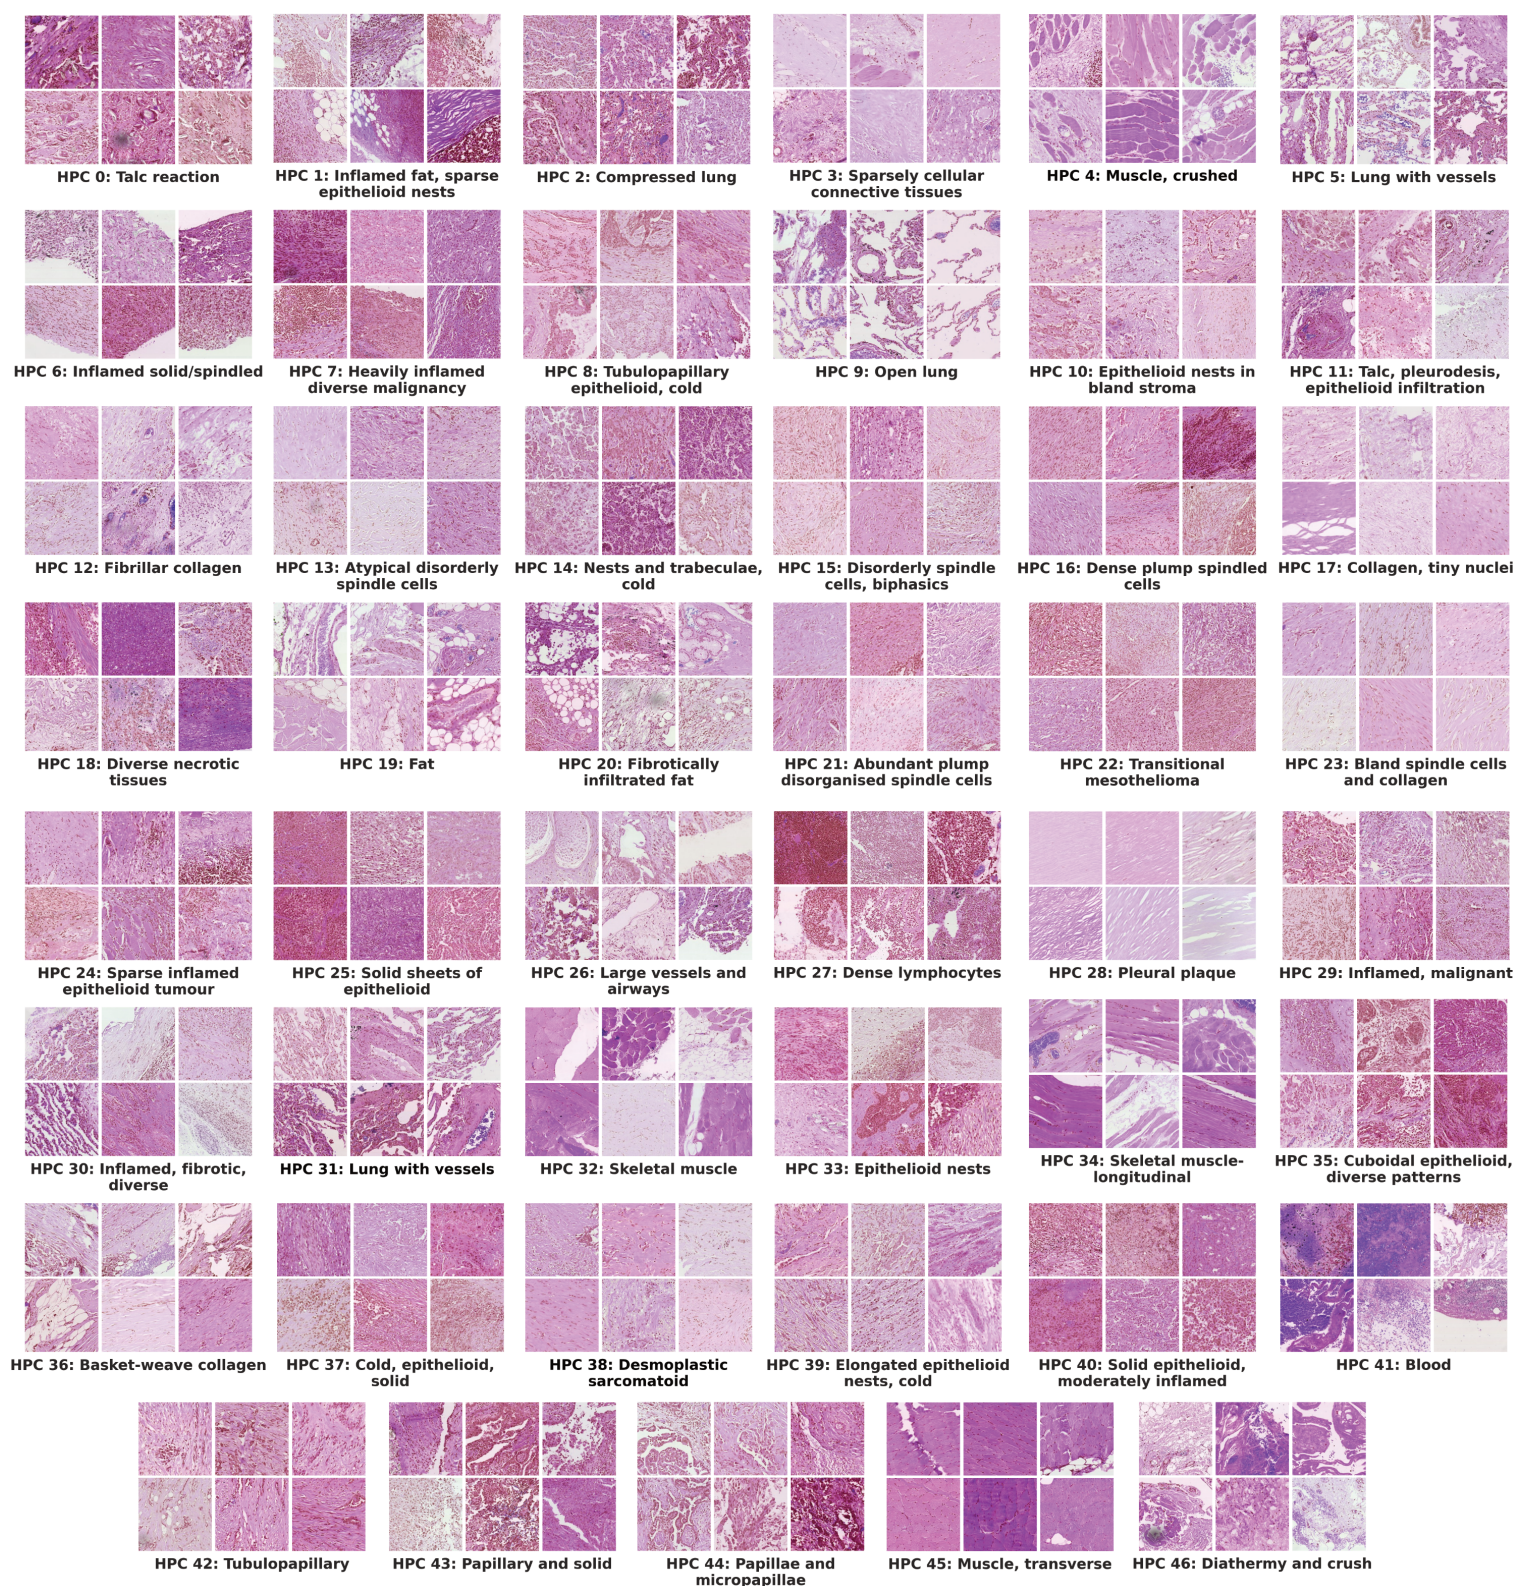

Supplementary Figure 1: Examples of tiles from LATTICE-M Dataset assigned to All HPCs



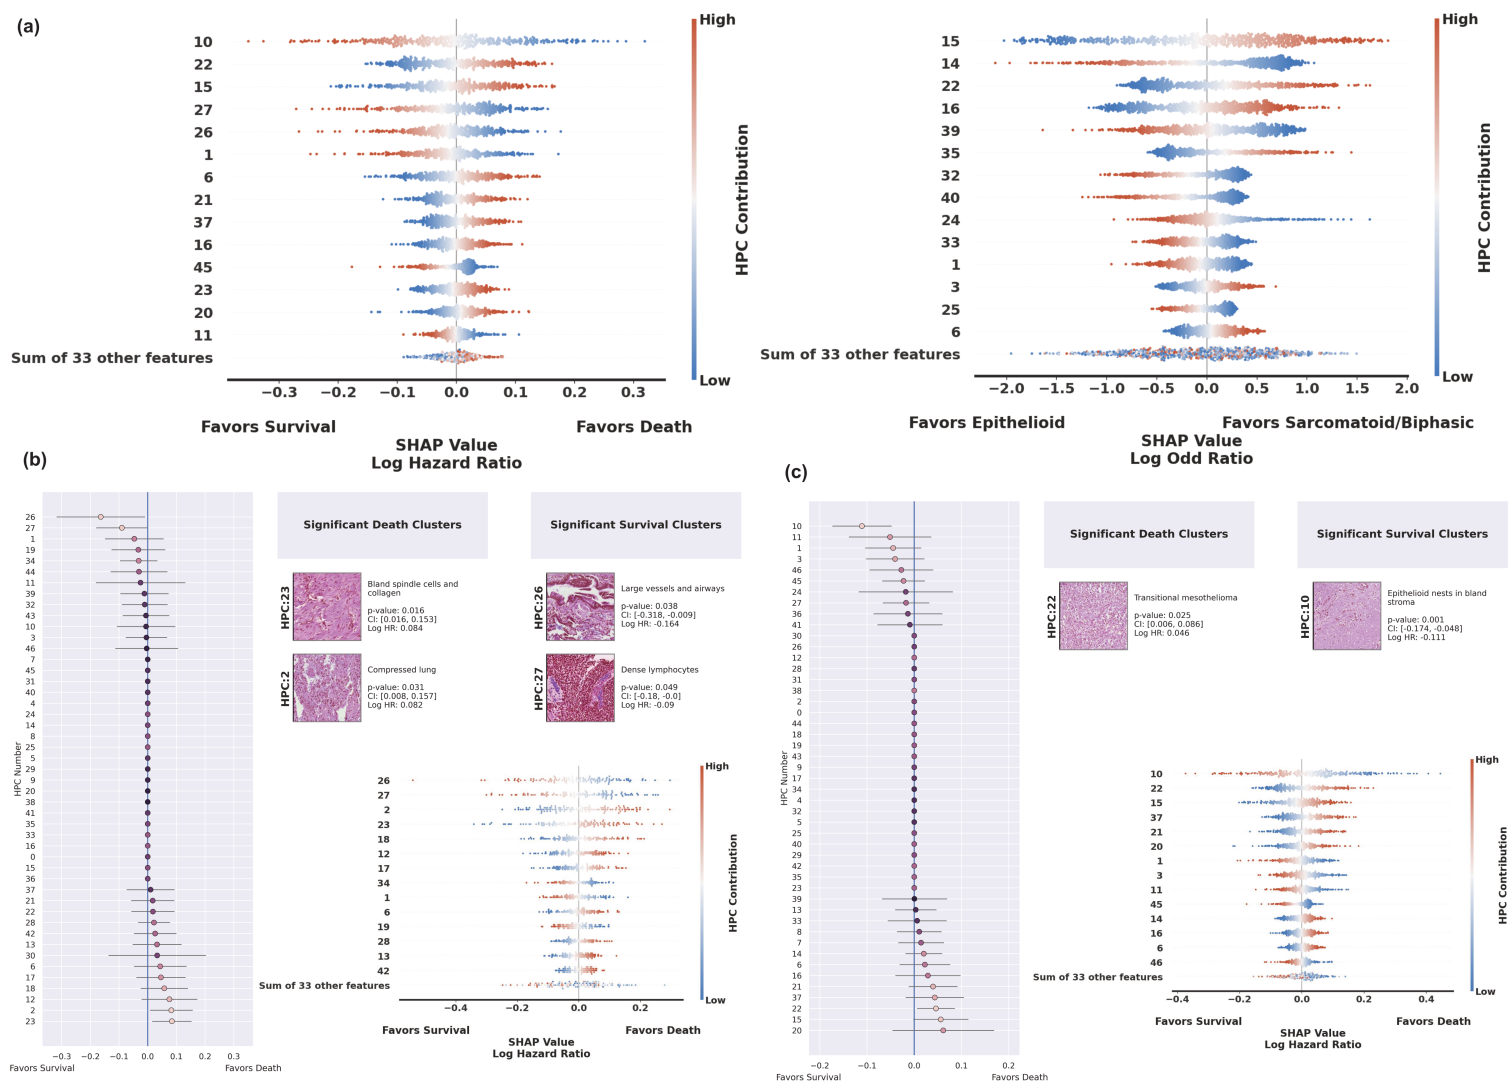

**Supplementary Figure 2:** (a) SHAP plots showing the impact of HPCs on predictive survival (left) and subtype (right) models, in order. (b),(c) SHAP and Forest plots from Cox models trained and tested separately on each mesothelioma subtype group cases, displaying HPC significance within each subtype. The plots are organised with Sarcomatoid/Biphasic on the left and Epithelioid on the right.

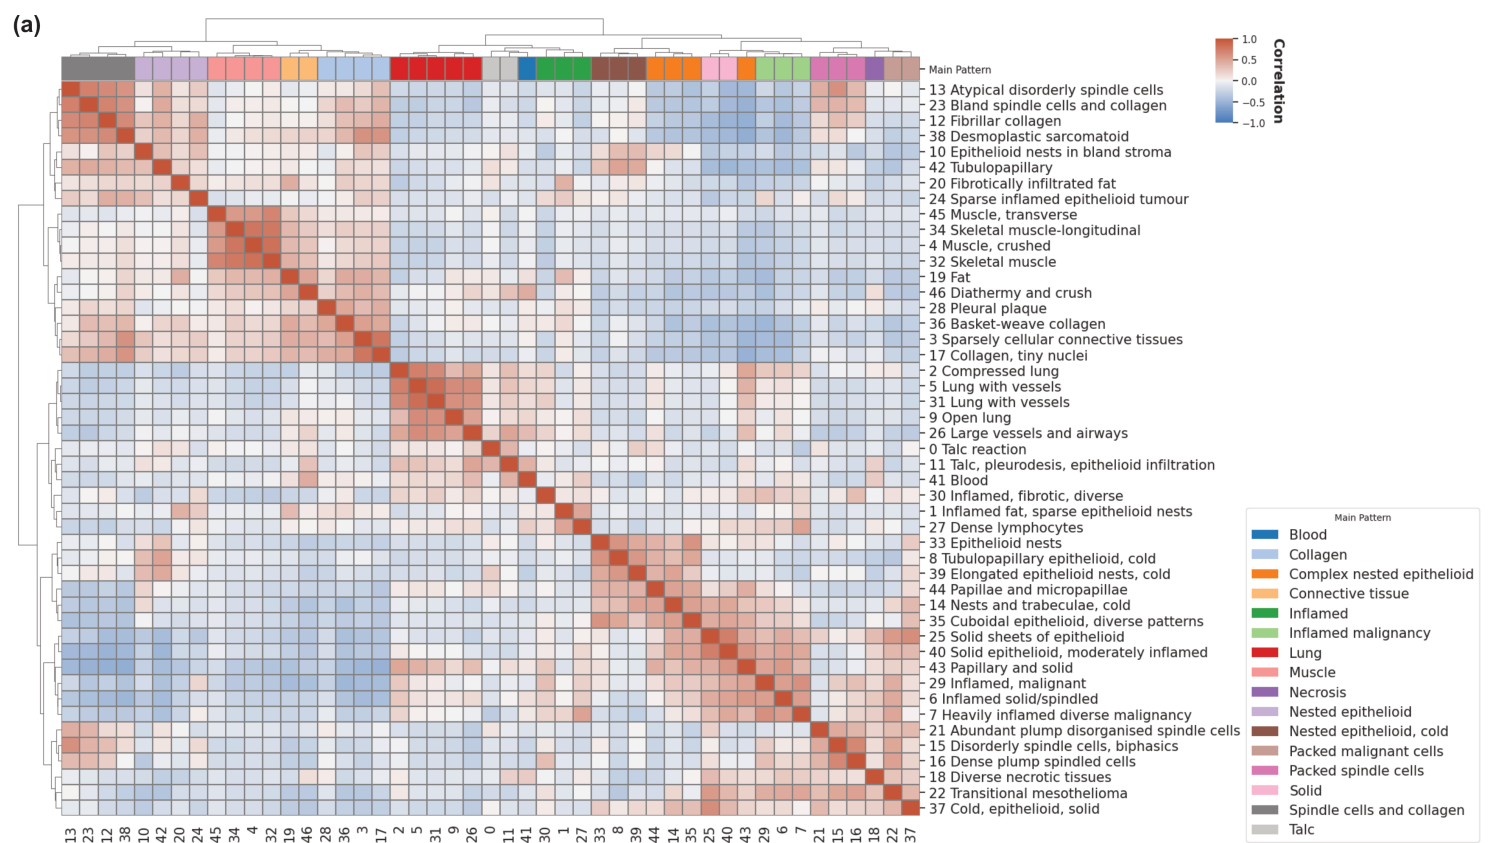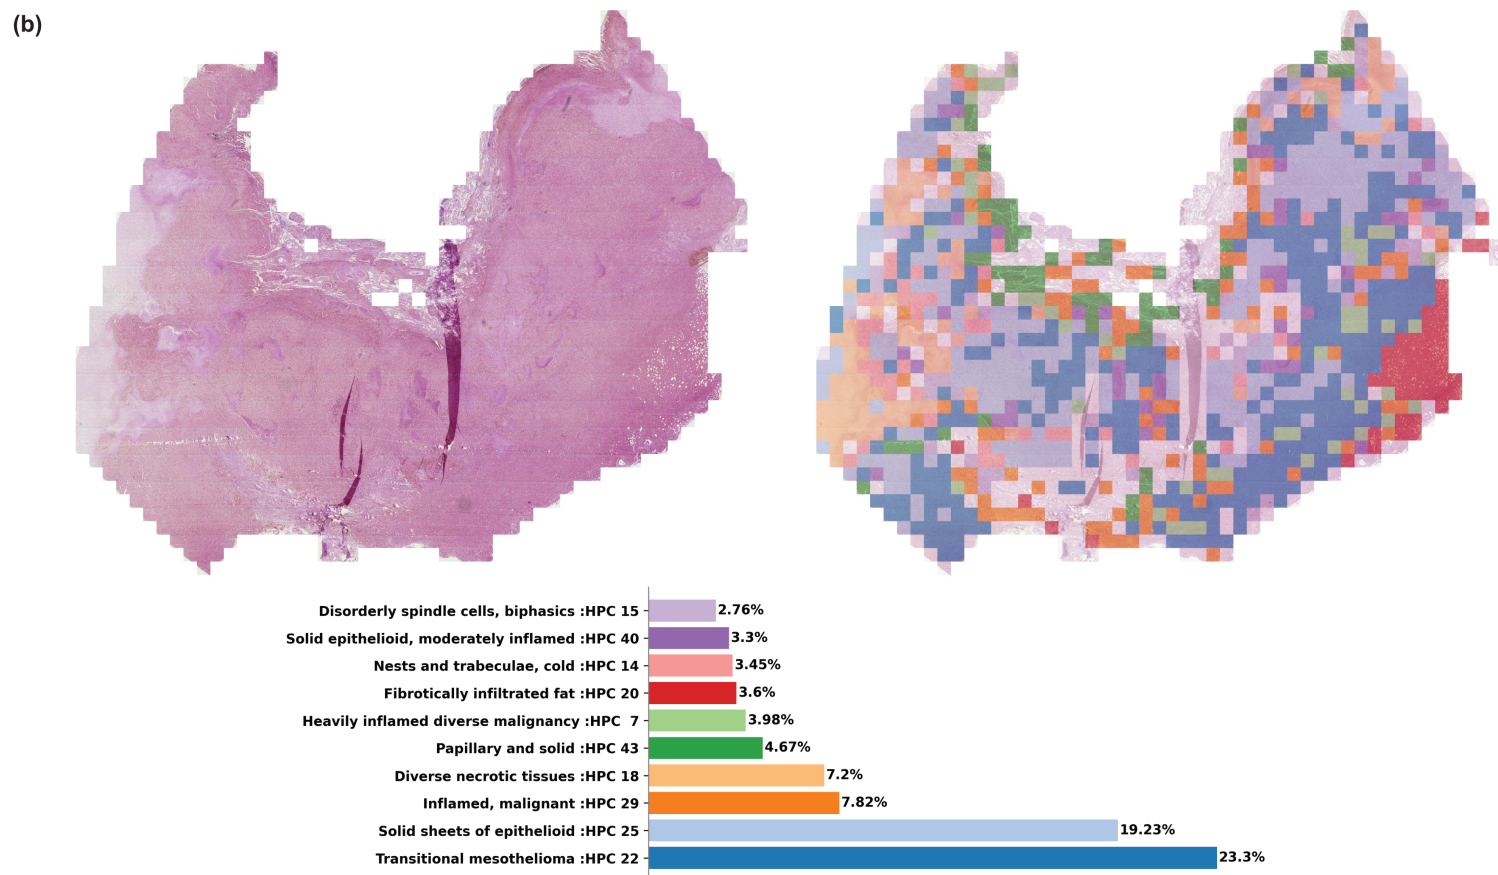

**Supplementary Figure 3:** (a)HPC Pearson correlation heatmap; annotations were independently provided by a pathologist after examination of representative sets of tile images (100 random tiles per HPC). The main pattern row displays supercluster annotations, confirming the model's clustering performance, as nearly identical HPCs within a supercluster are grouped together in the correlation matrix. (a)An epithelioid sample case characterised mostly by transitional mesothelioma HPC.
